# Supplementary material for: Activating the surface and bulk of hematite photoanodes to improve solar water splitting
Source: Royal Society of Chemistry journal article supplement (doi:10.1039/c9sc04110a), 2019-01-01
Supplement: c9sc04110a1.pdf [file c9sc04110a1.pdf]

## Electronic Supplementary Information

# Activating surface and bulk of hematite photoanodes to boost solar water splitting

Hemin Zhang,<sup>a</sup> Jong Hyun Park,<sup>b</sup> Woo Jin Byun,<sup>a</sup> Myoung Hoon Song,<sup>b</sup> Jae Sung Lee<sup>a,\*</sup>

<sup>a</sup>School of Energy and Chemical Engineering, Ulsan National Institute of Science and Technology (UNIST), 50 UNIST-gil, Ulsan 44919 (Republic of Korea)

<sup>b</sup>Perovtronics Research Center, Ulsan National Institute of Science and Technology (UNIST), 50 UNIST-gil, Ulsan, 44919 Republic of Korea.

### Corresponding Author

\*E-mail (Jae Sung Lee): [jlee1234@unist.ac.kr](mailto:jlee1234@unist.ac.kr)

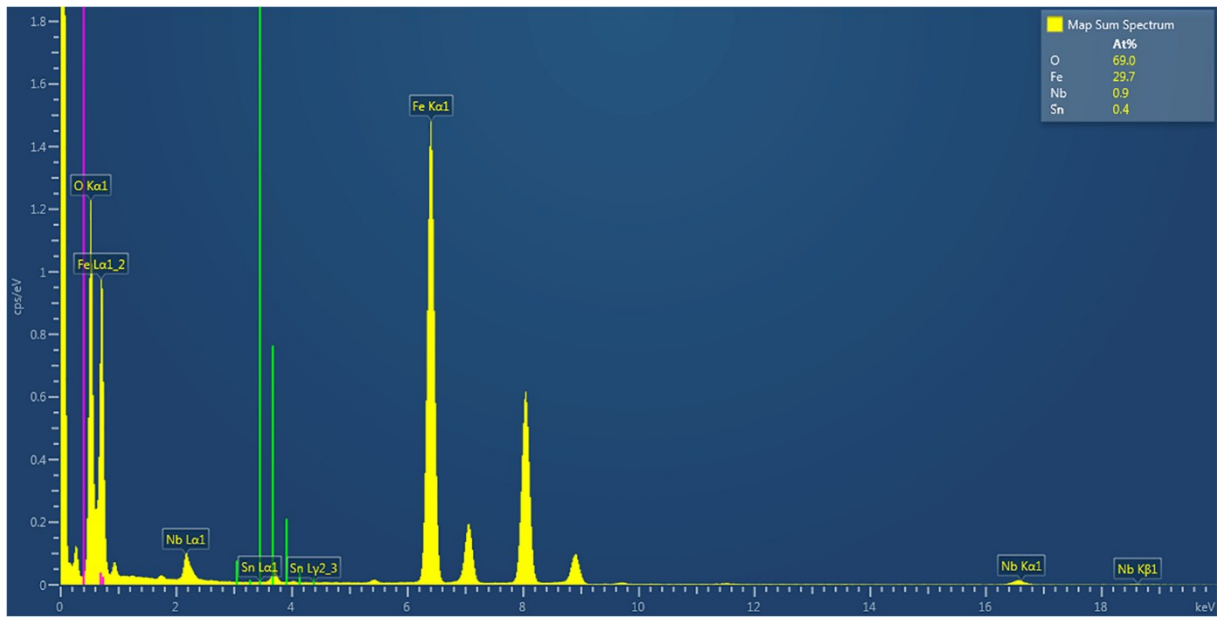

**Fig. S1** EDX spectrum of hematite nanorods with dual dopants of Nb and Sn.

**a** 20181205-1@720/725/730/735-ES@Quant@. All Data Report 12/5/2018, 3:23:14 PM

**Fe 238.204 Calibration (mg/kg) 12/5/2018, 10:47:23 AM Correlation Coefficient: 0.999998**

| Label      | Flags | Int. (c/s) | Std Conc. | Calc Conc. | Error  | %Error |
|------------|-------|------------|-----------|------------|--------|--------|
| Blank      |       | 4.63       | 0.000     | 0.000      | -      | -      |
| Standard 1 |       | 25505      | 1.00      | 1.02       | 0.018  | 1.8    |
| Standard 2 |       | 125131     | 5.00      | 4.99       | -0.006 | -0.1   |
| Standard 3 |       | 250596     | 10.0      | 10.0       | 0.001  | 0.0    |

Curve Type: Linear

Equation:  $y = 25055.9 x + 4.6$

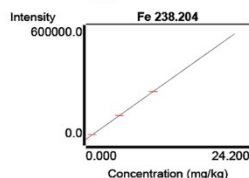

#1 (Samp)

12/5/2018, 10:34:13 AM

Tube 24

Weight: 0.0002

Volume: 50

Dilution: 1

| Label      | Sol'n Conc. | Units | SD    | %RSD | Int. (c/s) | Calc Conc.   | DF   |
|------------|-------------|-------|-------|------|------------|--------------|------|
| Fe 238.204 | 1.91        | mg/kg | 0.039 | 2.0  | 47832      | 477210 mg/kg | 1.00 |

**b** 20181205-2@720/725/730/735-ES@Quant@. All Data Report 12/5/2018, 3:22:45 PM

**Nb 309.417 Calibration (mg/kg) 12/5/2018, 11:33:37 AM Correlation Coefficient: 0.999993**

| Label      | Flags | Int. (c/s) | Std Conc. | Calc Conc. | Error  | %Error |
|------------|-------|------------|-----------|------------|--------|--------|
| Blank      |       | 13.9       | 0.000     | 0.000      | -      | -      |
| Standard 1 |       | 6577       | 1.00      | 0.979      | -0.021 | -2.1   |
| Standard 2 |       | 33348      | 5.00      | 4.97       | -0.028 | -0.6   |
| Standard 3 |       | 67157      | 10.0      | 10.0       | 0.016  | 0.2    |

Curve Type: Linear

Equation:  $y = 6703.6 x + 13.9$

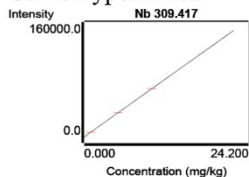

#1 (Samp)

12/5/2018, 11:39:03 AM

Tube 11

Weight: 0.0002

Volume: 50

Dilution: 1

| Label      | Sol'n Conc. | Units | SD    | %RSD | Int. (c/s) | Calc Conc.  | DF   |
|------------|-------------|-------|-------|------|------------|-------------|------|
| Nb 309.417 | 0.128       | mg/kg | 0.003 | 2.2  | 869        | 26218 mg/kg | 1.00 |

**Fig. S2** The concentration of Nb is 5.5 wt% by ICP-OES, which is consistent with the result of TEM-EDX (0.9 at%~5.2 wt%).

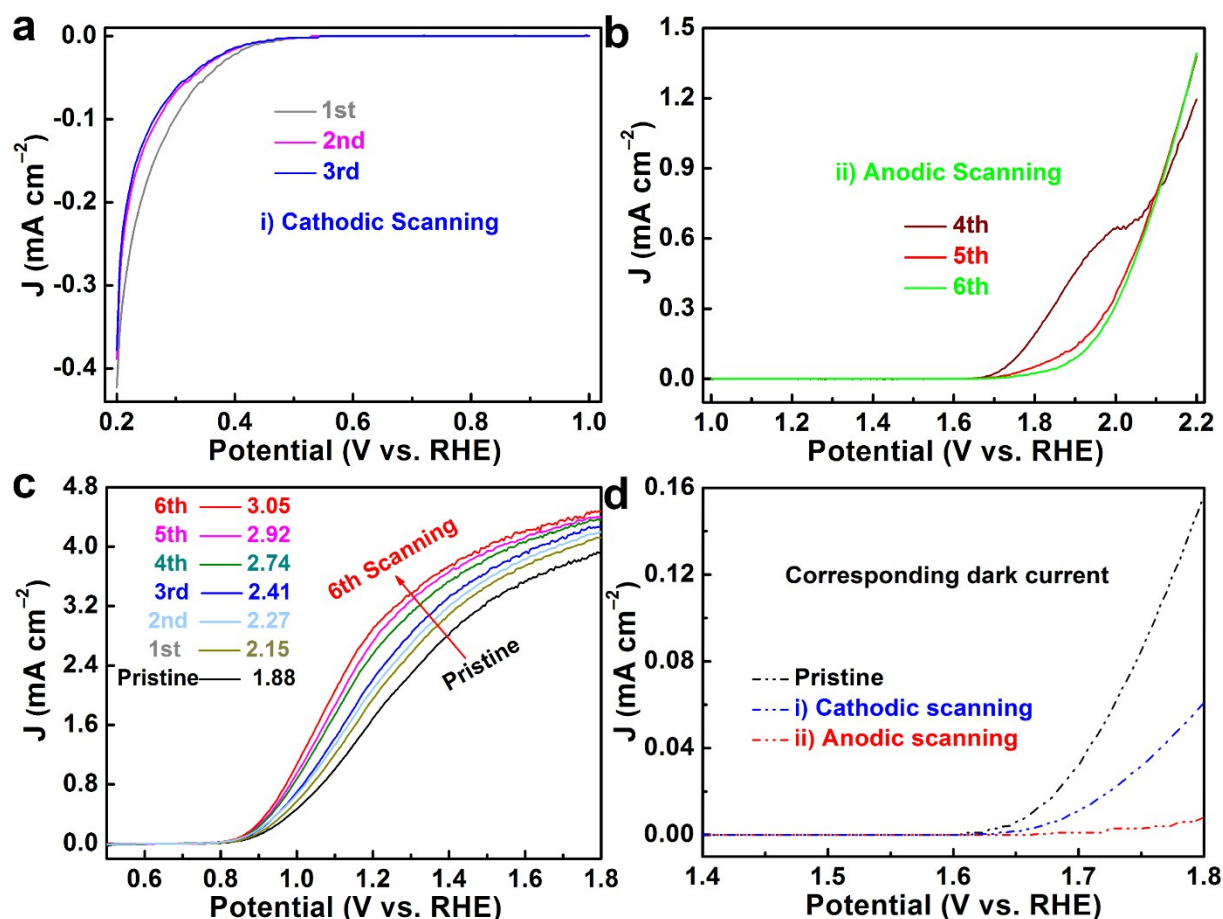

**Fig. S3** Electrochemical activation process: a thrice cathodic scanning (a) and a following thrice anodic scanning (b). The corresponding  $J$ - $V$  curves (c) and dark current density (d). The trend of activating treatment is that both first reduction (1<sup>st</sup> anodic scanning) and oxidation (4<sup>th</sup> cathodic scanning) scanings are much effective to improve photocurrent relative to the following scanings. This is reasonable because the first anodic/cathodic scanning in a certain (optimum) potential range will induce almost all the reactions that easily occur, and the following 2<sup>nd</sup> and 3<sup>rd</sup> ones will realize a little more difficult reactions. More scanings in a certain (optimum) potential range cannot improve the photocurrent further. During the process of cathodic and anodic scanning, the dark currents of the water reduction and oxidation reactions are suppressed, indicating that some active sites on the surface of hematite photoanode were removed. On this basis, we rule out the enhancement of photocurrent densities of the activated films being a result of a higher concentration of active sites. Notably, there is an obvious shoulder between the first anodic scanning (the 4<sup>th</sup> scanning) and the second anodic scanning (the 5<sup>th</sup> scanning), which suggests that some oxidation occurred in the photoelectrode after cathodic reduction.

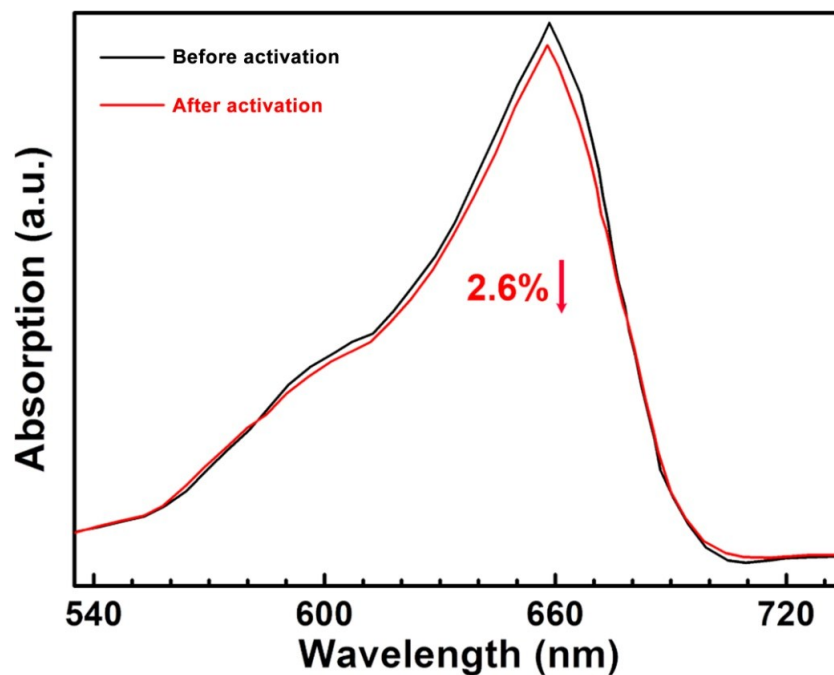

**Fig. S4** Absorption spectra from the desorbed methylene blue dye molecules using geometric area of hematite nanorod films ( $1 \text{ cm}^2$ ) before and after activation treatment. The samples with and without activation were immersed into  $0.1 \text{ mM L}^{-1}$  methylene blue aqueous solution for 24 h. Subsequently, the samples were dipped into deionized water for 2 min, then taken out and dried by nitrogen. Each sample was immersed into the same volume of acetonitrile for 20 min to make desorption of methylene blue molecules. The characteristic absorbance peak at  $\sim 655 \text{ nm}$  is a good indicator of the amount of desorbed molecules, which indirectly confirms the surface area of hematite nanorods.<sup>1</sup>

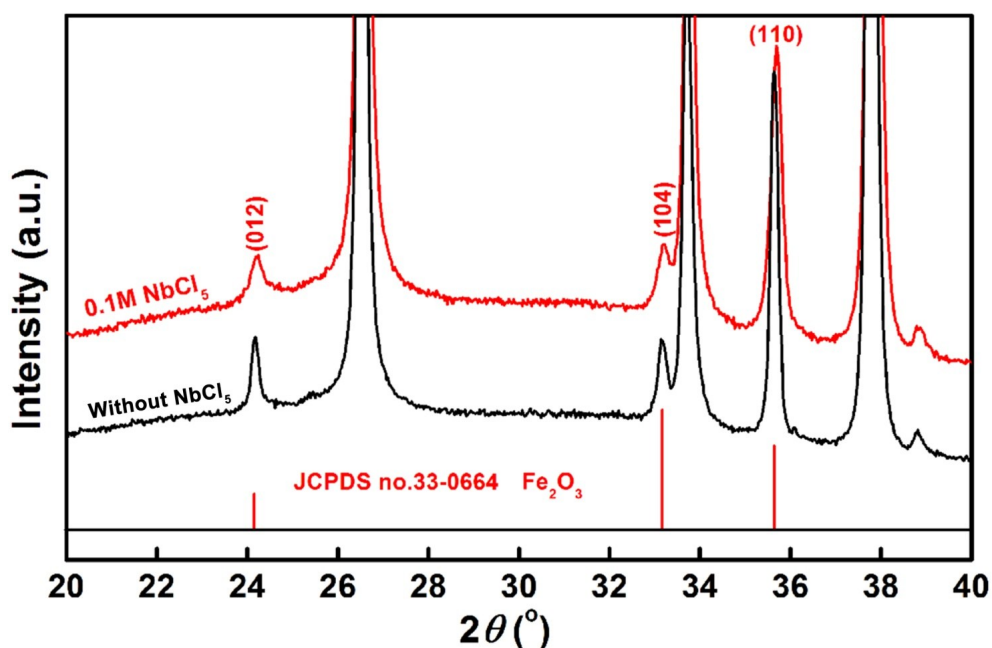

**Fig. S5** XRD spectra with and without  $0.1 \text{ M NbCl}_5$ , finally forming Nb, Sn co-doped and Sn doped hematite nanorods, respectively.

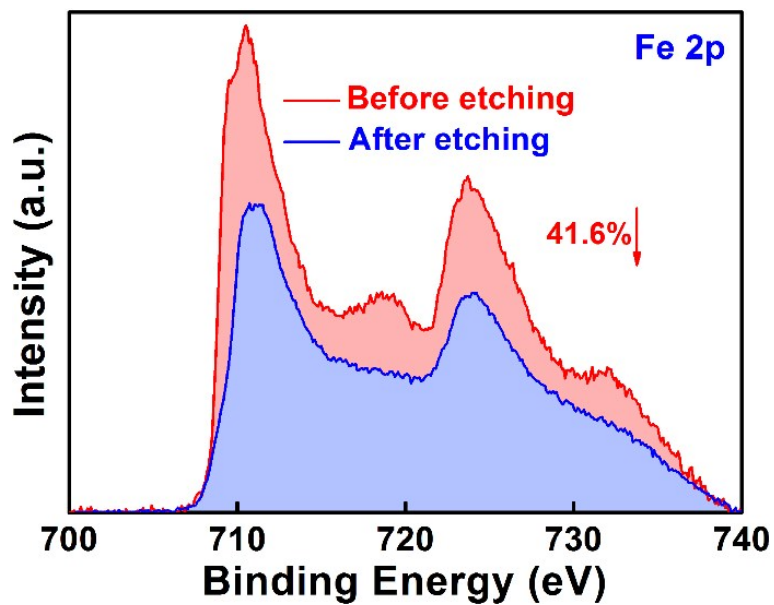

Fig. S6 Calculation of the increased intensity by integration of peak areas.

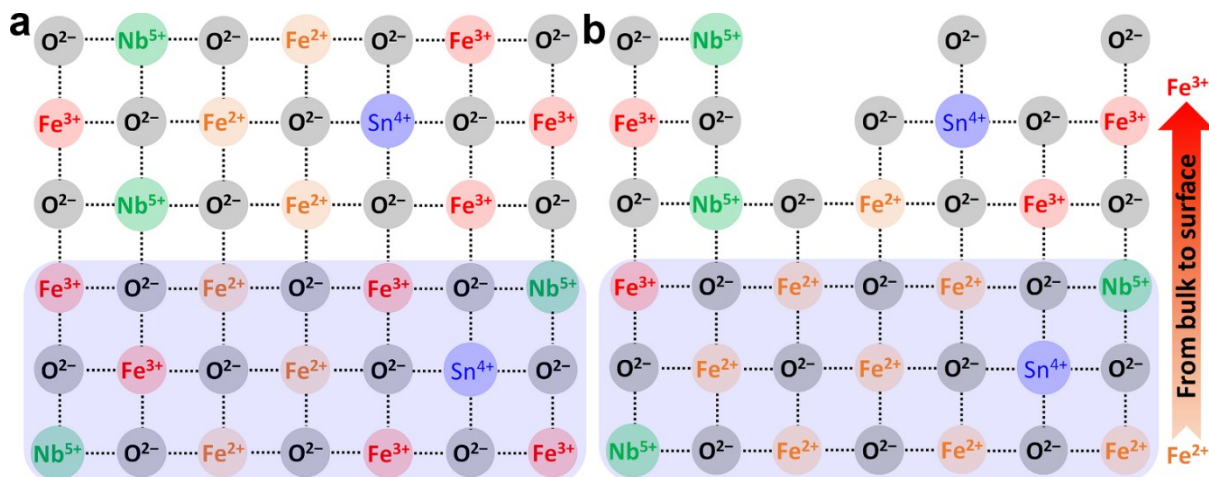

Fig. S7 Schematic illustration for surface and bulk of elemental variation before (a) and after (b) the electrochemical activation treatment.

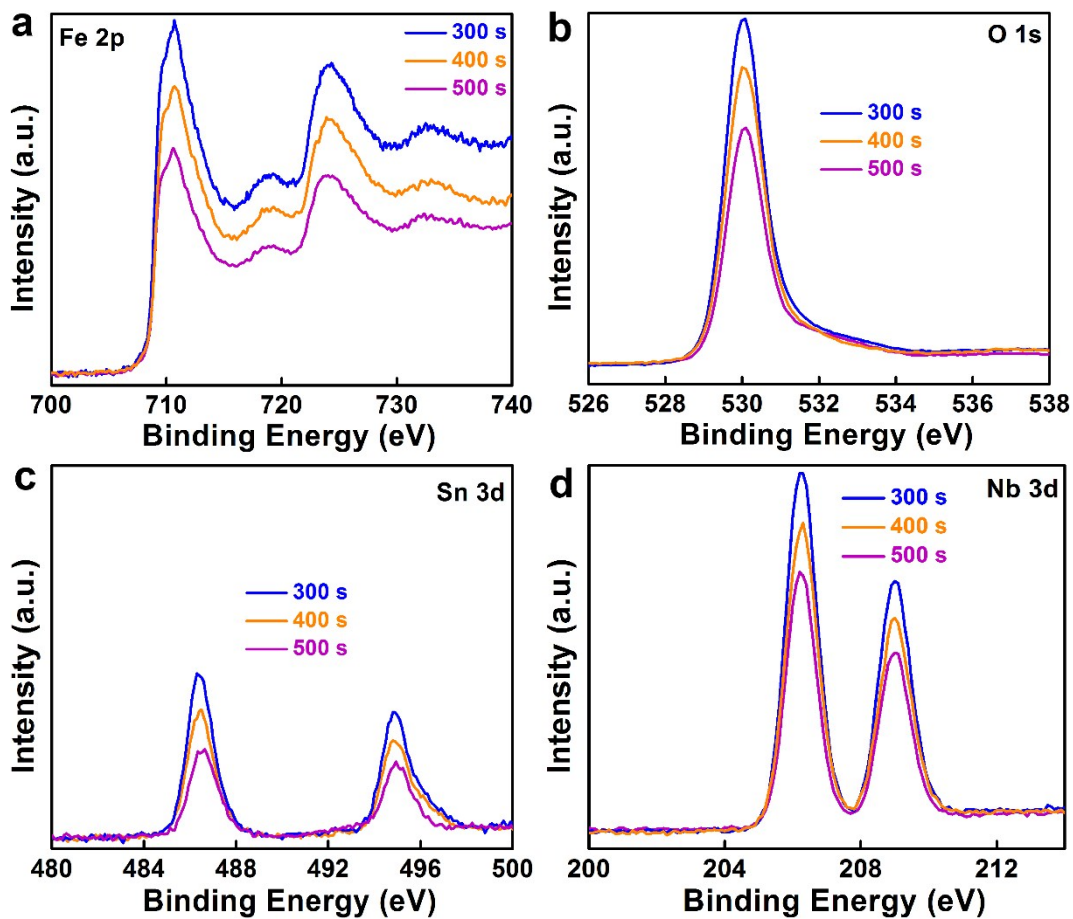

Fig. S8 The prolonged depth profiling for the pristine sample.

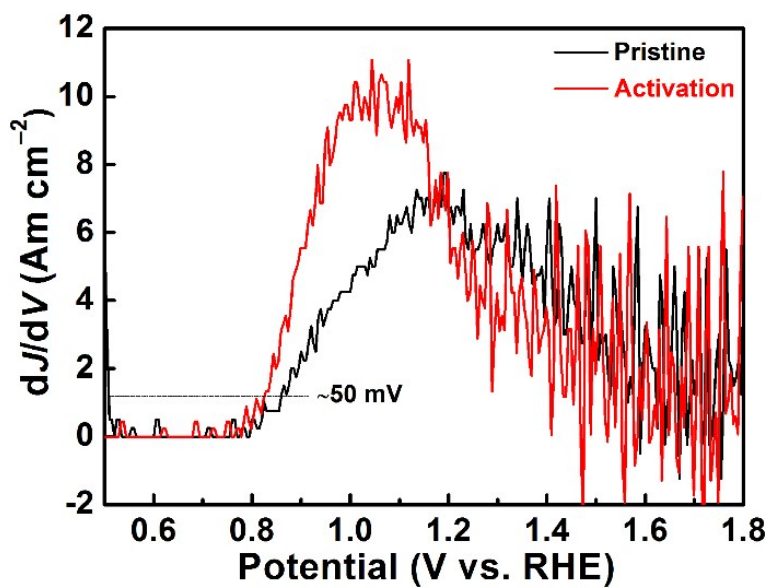

Fig. S9 Onset potential estimated by plotting the first order derivative of the photocurrent density against the voltage.

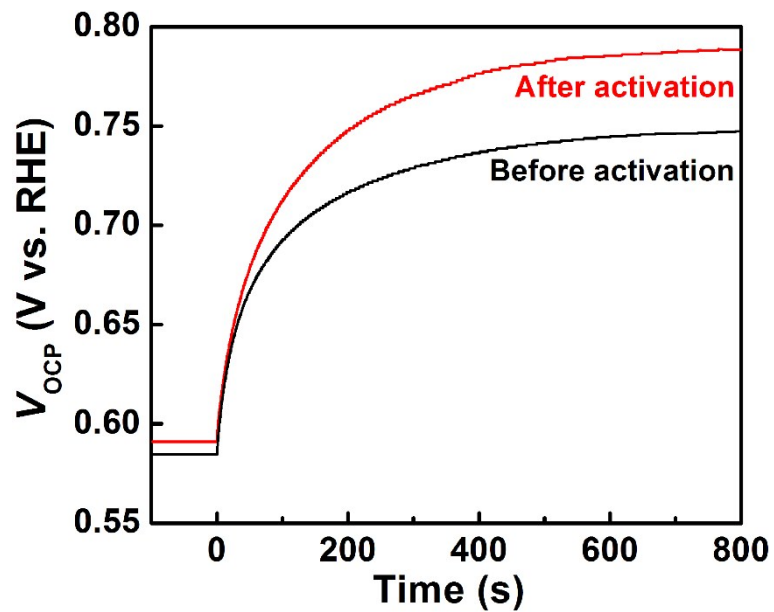

Fig. S10 photovoltage before and after activation.

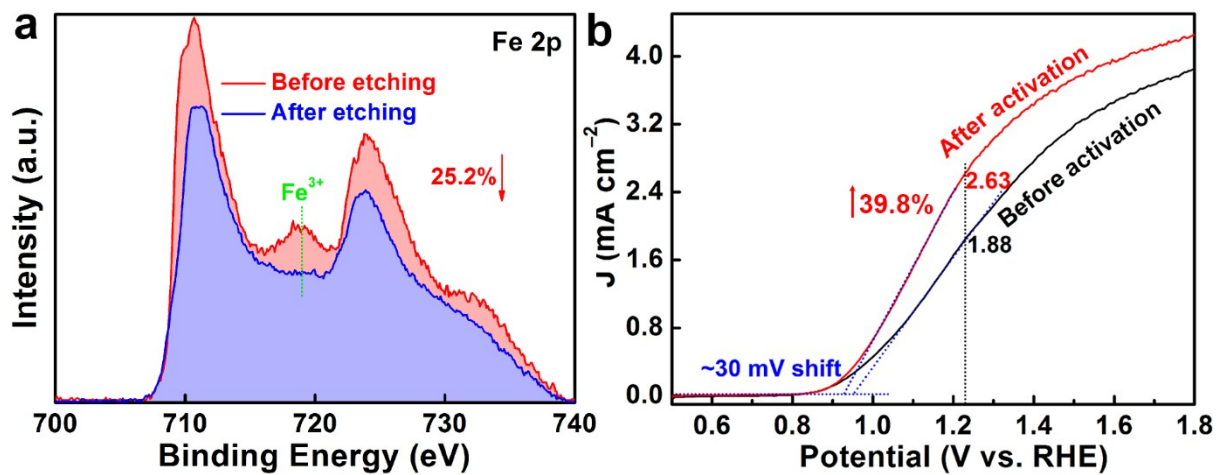

Fig. S11 Fe 2p XPS spectra (a) of activated sample before and after 300 s surface etching (~5 nm) using a reversed activation process (initial thrice anodic scanning followed by thrice cathodic scanning), and corresponding  $J$ - $V$  curves (b).



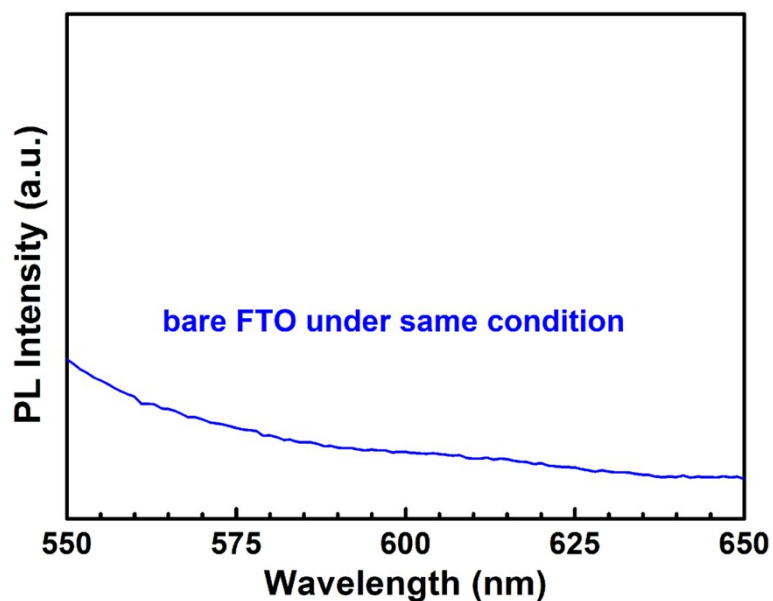

Fig. S12 PL of bare FTO under same synthesized condition as hematite.

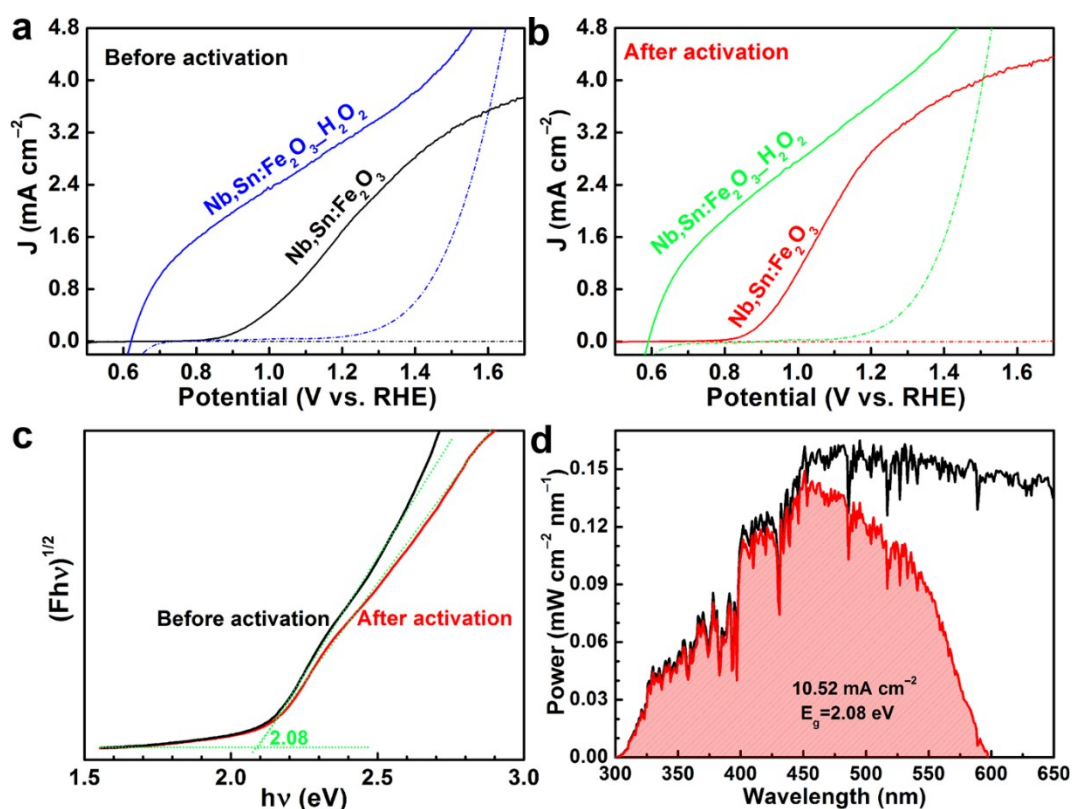

**Fig. S13**  $J$ - $V$  curves measured in 1 M KOH electrolyte with and without addition of 0.5 M  $\text{H}_2\text{O}_2$  (a, pristine hematite. b, hematite after activation). (c) The derived bandgap from corresponding UV-vis absorption (Fig. 1d). (d) Light harvesting efficiency (LHE) of hematite corresponding to AM 1.5 G spectrum (Both are equal value because of almost same LHE and bandgap). Absorption photocurrents ( $J^{abs}$ ):  $10.52 \text{ mA cm}^{-2}$ ,  $<597 \text{ nm}$ .

The obtained photocurrent density,  $J_{H_2O}$ , could be represented as following:

$$J_{H_2O} = J_{abs} \times \eta_{bulk} \times \eta_{surface} \quad (1)$$

Since there is no injection barrier of holes for  $H_2O_2$  oxidation ( $\eta_{surface} = 1$ )

$$J_{H_2O_2} = J_{abs} \times \eta_{bulk} \quad (2)$$

Hence  $\eta_{surface} = J_{H_2O} / J_{H_2O_2}$  (3)

And  $\eta_{bulk} = J_{H_2O_2} / J_{abs}$  (4)

Here,  $J_{H_2O_2}$  is the photocurrent density measured in 1 M NaOH with 0.5 M  $H_2O_2$  and  $J_{abs}$  is the expected photocurrent density when absorbed photons are completely converted into current.

For calculation of  $J_{abs}$ , the correlation between absorbance and irradiation is the following:<sup>2</sup>

$$P_d = P_0 10^{-A} \quad (5)$$

$$P_{abs} = P_0 (1 - 10^{-A}) \quad (6)$$

$P_0$  (unit:  $mW\ cm^{-2}\ nm^{-1}$ ) is power provided by solar simulator (in this case, AM 1.5G),  $P_{abs}$  is power of light actually absorbed by photoanode and  $P_d$  is power of light not absorbed at the photoanode but dissipated by reflection and penetration.  $A$  is absorbance of photoanode and LHE is defined as  $1 - 10^{-A}$ . So light not absorbed at the photoanode will be  $10^{-A}$ . Integration of  $P_{abs}(\lambda)$  ( $mW\ cm^{-2}\ nm^{-1}$ ) along with wavelength  $\lambda$  gives total power density (unit of  $mW\ cm^{-2}$ ), which is the power of light absorbed by photoanode (maximum power of photoanode). The following formula shows such relationship photon absorption ( $J_{abs}$ ).

$$J_{abs} \left( \frac{mA}{cm^2} \right) = \int_{\lambda_1}^{\lambda_2} \frac{\lambda}{1240} P_{abs}(\lambda) d\lambda \left( \frac{mW}{cm^2} \right) \quad (7)$$

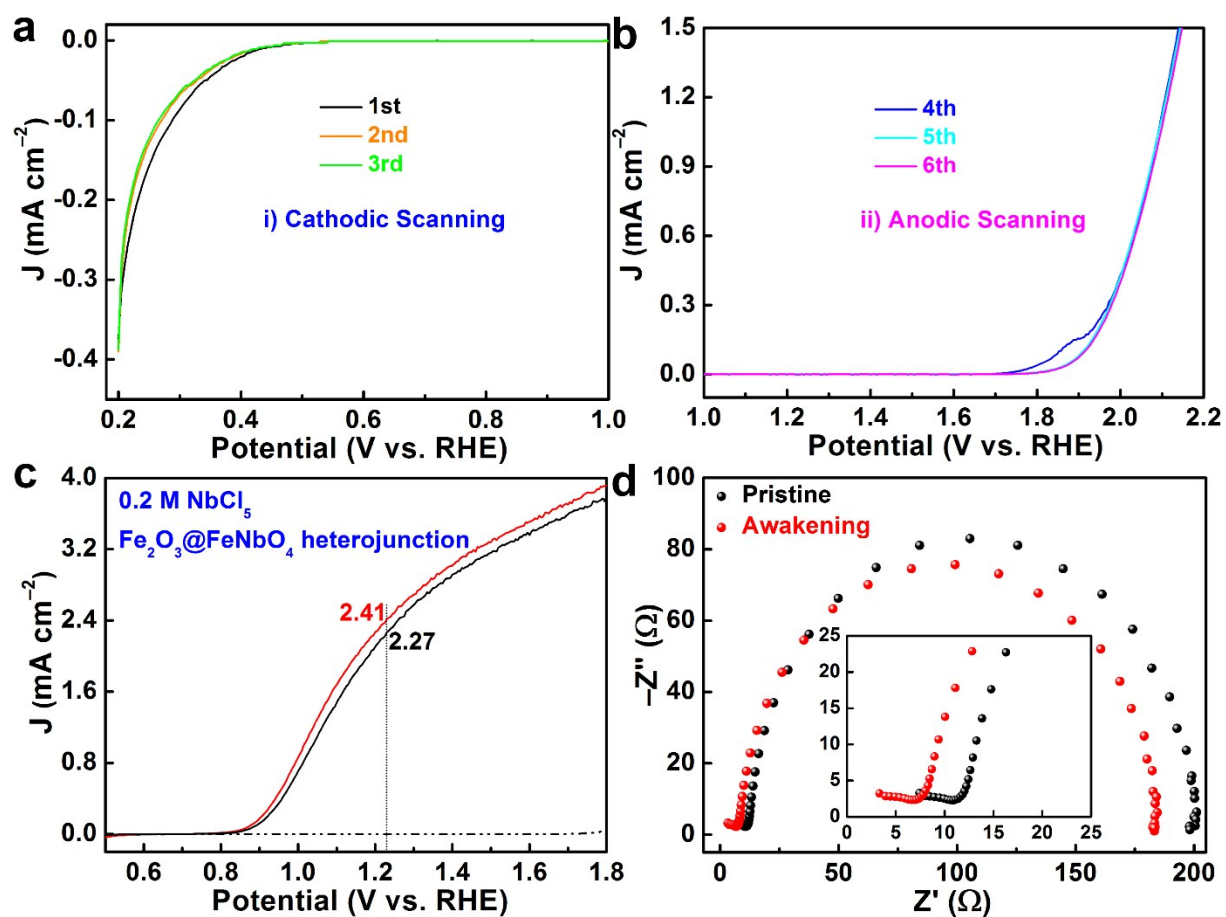

**Fig. S14** Electrochemical activation of core-shell  $\text{Fe}_2\text{O}_3@ \text{FeNbO}_4$  heterojunction nanorods: a thrice cathodic scanning (a) and a following thrice anodic scanning (b). The corresponding  $J$ - $V$  curves (c) and EIS (d) before and after activation.

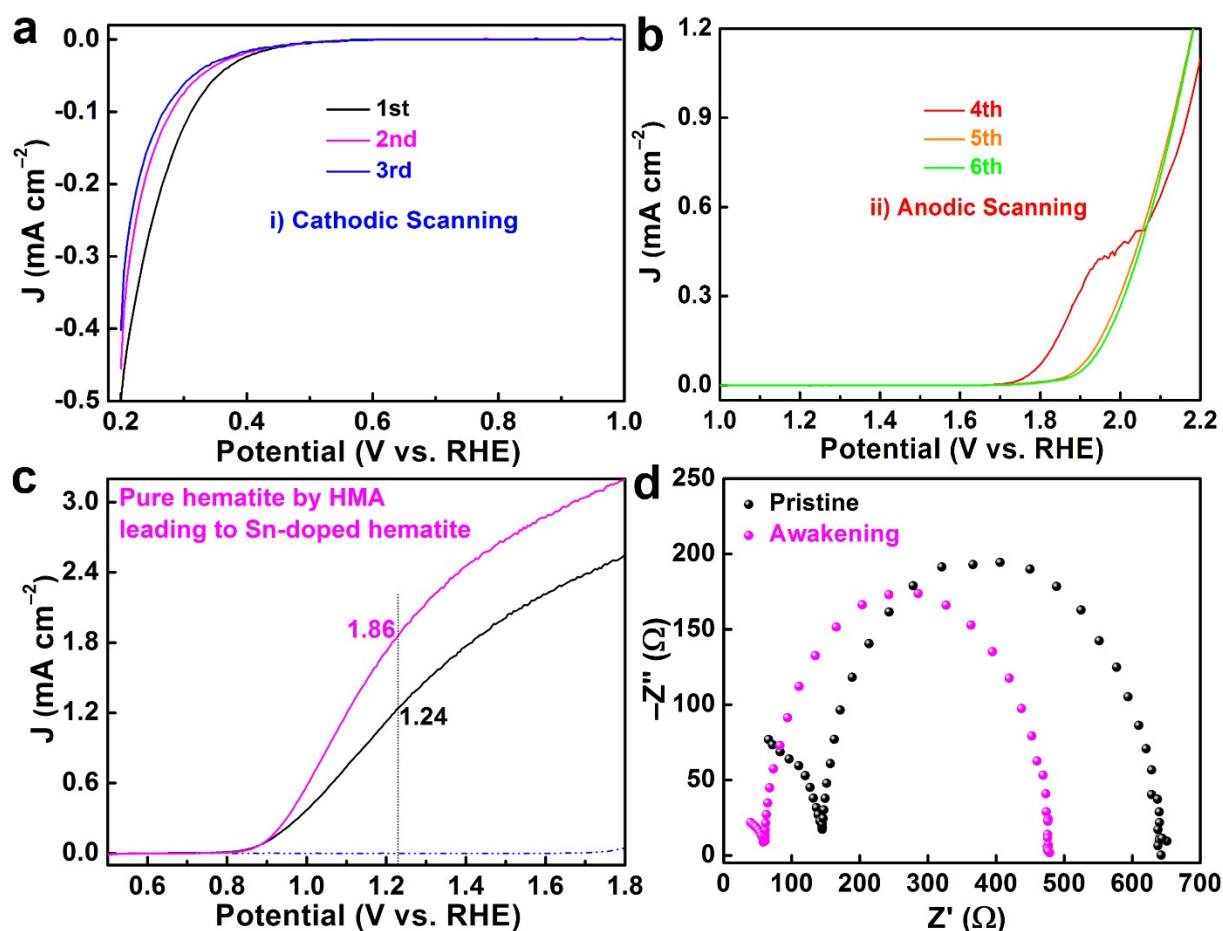

**Fig. S15** Electrochemical activation of Sn-doped hematite nanorods: a thrice cathodic scanning (a) and a following thrice anodic scanning (b). The corresponding  $J$ - $V$  curves (c) and EIS (d) before and after activation.

**Table S1.** Several samples of  $\text{Nb}_3\text{Sn}:\text{Fe}_2\text{O}_3$  photoanodes by electrochemical activation.

| $\text{Nb}_3\text{Sn}:\text{Fe}_2\text{O}_3$ | Photocurrent ( $\text{mA cm}^{-2}$ )<br>pristine→activated (percent) | Onset potential ( $V_{\text{RHE}}$ )<br>pristine→activated (shift) |
|----------------------------------------------|----------------------------------------------------------------------|--------------------------------------------------------------------|
| Sample 1                                     | 1.81→2.95 (62.9%↑)                                                   | 0.98→0.90 (~80 mV)                                                 |
| Sample 2                                     | 1.79→2.93 (63.7%↑)                                                   | 0.96→0.89 (~70 mV)                                                 |
| Sample 3                                     | 1.91→3.01 (57.6%↑)                                                   | 1.00→0.94 (~60 mV)                                                 |
| Sample 4                                     | 1.88→3.05 (62.3%↑)                                                   | 0.95→0.88 (~70 mV)                                                 |

**Table S2.** The fitting results of EIS by Z-view software.

| <b>R (<math>\Omega</math>)</b><br><b>C (F)</b> | <b>R<sub>s</sub></b> | <b>R<sub>ct</sub></b> | <b>R<sub>trap</sub></b> | <b>C<sub>bulk</sub></b> | <b>C<sub>trap</sub></b> |
|------------------------------------------------|----------------------|-----------------------|-------------------------|-------------------------|-------------------------|
| <b>Before activation</b>                       | 33.2                 | 88.4                  | 201.1                   | $1.85 \times 10^{-8}$   | $1.16 \times 10^{-5}$   |
| <b>After activation</b>                        | 28.8                 | 58.9                  | 99.2                    | $7.78 \times 10^{-8}$   | $8.33 \times 10^{-5}$   |

**Table S3.** The fitting results of time-resolved PL by fitting software (FluoFit).

| <b>Samples</b>           | <b><math>\tau_{\text{avg}}</math> [ns]</b> | <b><math>\tau_1</math> [ns]</b> | <b><math>\tau_2</math> [ns]</b> | <b><math>\tau_3</math> [ns]</b> | <b><math>\chi^2</math></b> |
|--------------------------|--------------------------------------------|---------------------------------|---------------------------------|---------------------------------|----------------------------|
| <b>Before activation</b> | 3.265                                      | 0.995 (39.50%)                  | 3.482 (47.22%)                  | 9.249 (13.28%)                  | 1.04                       |
| <b>After activation</b>  | 3.494                                      | 0.883 (35.41%)                  | 3.538 (49.57%)                  | 9.498 (15.02%)                  | 1.128                      |

**Table S4.** Several samples of Nb,Sn:Fe<sub>2</sub>O<sub>3</sub> photoanodes by electrochemical activation<sup>1</sup>.

| <b>Nb,Sn:Fe<sub>2</sub>O<sub>3</sub>@FeNbO<sub>4</sub></b> | <b>Photocurrent (mA cm<sup>-2</sup>)<br/>pristine→activated (percent)</b> |
|------------------------------------------------------------|---------------------------------------------------------------------------|
| Sample 1                                                   | 2.20→2.33 (5.9%↑)                                                         |
| Sample 2                                                   | 2.24→2.37 (5.8%↑)                                                         |
| Sample 3                                                   | 2.27→2.41 (6.2%↑)                                                         |

<sup>1</sup>Onset potential shifts were negligible.**Table S5.** Several samples of Sn:Fe<sub>2</sub>O<sub>3</sub> photoanodes by electrochemical activation.

| <b>Sn:Fe<sub>2</sub>O<sub>3</sub></b> | <b>Photocurrent (mA cm<sup>-2</sup>)<br/>pristine→activated (percent)</b> | <b>Onset potential (V<sub>RHE</sub>)<br/>pristine→activated (shift)</b> |
|---------------------------------------|---------------------------------------------------------------------------|-------------------------------------------------------------------------|
| Sample 1                              | 1.19→1.74 (46.2%↑)                                                        | 0.93→0.92 (~10 mV)                                                      |
| Sample 2                              | 1.27→1.81 (42.5%↑)                                                        | 0.94→0.94 (~0 mV)                                                       |
| Sample 3                              | 1.24→1.86 (44.4%↑)                                                        | 0.92→0.90 (~20 mV)                                                      |

**References:**

- (1) Yang, Y.; Forster, M.; Ling, Y.; Wang, G.; Zhai, T.; Tong, Y.; Cowan, A. J.; Li, Y., Acid Treatment Enables Suppression of Electron-Hole Recombination in Hematite for Photoelectrochemical Water Splitting. *Angew. Chem. Int. Ed.* **2016**, *55*, 3403-3407.
- (2) Jeong, H. W.; Jeon, T. H.; Jang, J. S.; Choi, W.; Park, H., Strategic Modification of BiVO<sub>4</sub> for Improving Photoelectrochemical Water Oxidation Performance. *J. Phys. Chem. C* **2013**, *117*, 9104-9112.
